# Supplementary material for: Gold nanoparticle–cellulose/PDMS nanocomposite: a flexible dielectric material for harvesting mechanical energy
Source: Royal Society of Chemistry journal article supplement (doi:10.1039/c9ra10811d), 2020-01-01
Supplement: c9ra10811d1.pdf [file c9ra10811d1.pdf]

## Gold Nanoparticle-Cellulose/PDMS Nanocomposite: A Flexible Dielectric Material for Harvesting Mechanical Energy

Manojit Pusty and Parasharam M. Shirage \*

Discipline of Metallurgy Engineering and Materials Science, Indian Institute of Technology  
Indore, Simrol, Indore 453552. India

\* Corresponding Author E-mail: paras.shirage@gmail.com, pmshirage@iiti.ac.in.

Tel.: +91-787-5222-331

Piezoelectric coefficient measurement:

The piezoelectric coefficient ( $d_{33}$ ) value of the Cellulose/PDMS was measured to be 8 pC/N. The  $d_{33}$  coefficient was measured using a SINOCERA YE2730A  $d_{33}$  Meter under the condition of constant applied force of 0.5 N and frequency at 50 Hz.

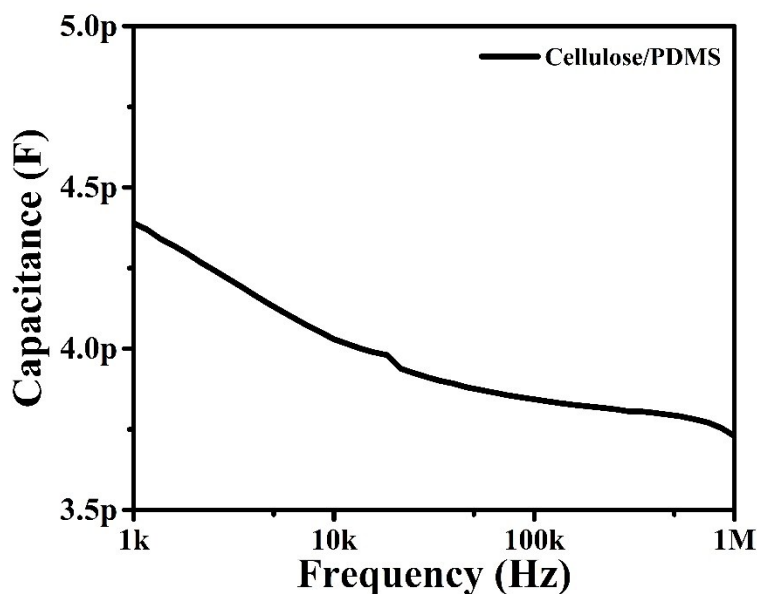

**Figure S1.** The variation of capacitance versus frequency curve of the Cellulose/PDMS composite used for HPNG fabrication.

The  $d_{33}$  value of Cellulose/PDMS was calculated from the capacitance vs frequency characteristics, which is shown in Figure S1. The capacitance vs frequency characteristics was measured using a NF ZM2376 LCR Meter.

To verify the measured  $d_{33}$  value a frequency dependent capacitance measurement was carried out using a NF ZM2376 LCR Meter. The following equation was used to calculate the  $d_{33}$  values:

$$d_{33} = \frac{V \times C}{F} \quad \text{-----}$$

### S1

Where, V is the output voltage from the Cellulose/PDMS which is found to be 6V, C is the capacitance of the Cellulose/PDMS at 1000 Hz frequency which is found to be 4.4 pF and F is the Force (3N) applied on the nanocomposite. The  $d_{33}$  coefficient of the Cellulose/PDMS was found to be 8.8 pC/N.
